# Supplementary material
Source: publisher site journal article supplement (https://www.dovepress.com/get_supplementary_file.php?f=268305.docx)
Supplement: Supplementary file 1 [file get_supplementary_file.php]

**Supplemental Table 1: Characteristics of Included 1st Line Studies**

| **Author** | **Year** | **Trial/**  **Phase** | **RECIST Version** | **Country** | **Majority Ethnicity** | **Treatment Arm** | **Comparative Arm** | **N** | **Median**  **Follow up**  **(months)** | **Median OS of Treatment of Interest**  **(months)** | **OS HR**  **(95% CI)** | **ORR**  **(%)** | **ORR OR**  **(95% CI)** |
| --- | --- | --- | --- | --- | --- | --- | --- | --- | --- | --- | --- | --- | --- |
| Yau[1] | 2019 | CheckMate 459/III | RECIST 1.1 | Multi-national | Caucasian | Nivolumab | Sorafenib | 743 | minimum 22.8 | 16.4 (13.9–18.4) | 0.85 [0.72-1.02] | 15.4 | 2.42 [1.48-3.94] |
| Finn[2] | 2020 | IMbrave150/III | RECIST 1.1 | Multi-national | Asian | Atezolizumab + Bevacizumab | Sorafenib | 485 | 8.9 | Not evaluated | 0.58 [0.42-0.79] | 27.3 | 2.77 [1.62-4.74] |
| Llovet[3] | 2008 | SHARP/III | RECIST 1.0 | Multi-national | Caucasian | Sorafenib | Placebo | 602 | 13 | 10.7 | 0.69 [0.55-0.87] | 0.7 | 2.03 [0.18-22.5] |
| Cheng[4] | 2009 | NCT00492752/III | RECIST 1.0 | Multi-national | Asian | Sorafenib | Placebo | 226 | 16 | 6.5 | 0.57 [0.42-0.79] | 3.3 | 2.59 [0.30-22.5] |
| Abou-Alfa[5] | 2019 | CALGB80802/III | RECIST 1.1 | Multi-national | White | Sorafenib + Doxorubicin | Sorafenib | 356 | minimum 15 | 9.3 | 1.05 [0.83-1.31] | 8.3 | 1.91 [0.79-4.62] |
| Kudo[6] | 2018 | REFLECT/III | RECIST 1.1 | Multi-national | Asian | Lenvatinib | Sorafenib | 954 | 27.7 | 13.6 | 0.92 [0.79-1.06] | 18.8 | 3.34 [2.17-5.14] |
| Bi[7] | 2020 | NCT02645981/II-III | RECIST 1.1 | China | Asian | Donafenib | Sorafenib | 659 | NR | 12.1 | 0.83 [0.69-0.98] | 4.6 | 1.71 [0.74-3.98] |
| Cheng[8] | 2013 | SUN1170/III | RECIST 1.0 | Multi-national | NR | Sunitinib | Sorafenib | 1074 | 15 | 7.9 | 1.30 [1.13-1.50] | 6.6 | 1.09 [0.67-1.79] |
| Johnson[9] | 2013 | BRISK-FL/III | mRECIST | Multi-national | Asian | Brivanib | Sorafenib | 1155 | NR | 9.5 | 1.06 [0.93-1.22] | 12.0 | 1.40 [0.96-2.06] |
| Zhu[10] | 2015 | SEARCH/III | RECIST 1.0 | Multi-national | Caucasian | Erlotinib + Sorafenib | Sorafenib | 720 | NR | 9.5 | 0.92 [0.78-1.10] | 6.6 | 1.74 0.89-3.43] |
| Cainap[11] | 2015 | NCT01009593/III | RECIST 1.1 | Multi-national | Asian | Linifanib | Sorafenib | 1035 | NR | 9.1 | 1.04 [0.89-1.22] | 13.0 | 2.02 [1.32-3.09] |
| Cheng[12] | 2015 | NCT01033240/II | NR | Multi-national |  | Tigatuzumab + Sorafenib | Sorafenib | 162 | NR | 12.2 (high dose TIG)  8.2 (low dose TIG) | 1.02 [0.72-1.43] | NR | NR |
| Kudo[13] | 2017 | NCT02400788/II | NR | Multi-national |  | Resminostat + Sorafenib | Sorafenib | 164 | 13.8 | 11.8 | 0.98 [0.68-1.41] | NR | NR |

**Supplemental Table 2: Characteristics of Included 2nd Line Studies**

| **Author** | **Year** | **Trial/**  **Phase** | **RECIST** | **Country** | **Majority Ethnicity** | **Treatment Arm** | **N** | **Median**  **Follow up**  **(months)** | **Median OS**  **(months)** | **OS HR**  **(95% CI)** | **PFS**  **(months)** | **PFS HR**  **(95% CI)** | **ORR**  **(%)** | **ORR OR**  **(95% CI)** |
| --- | --- | --- | --- | --- | --- | --- | --- | --- | --- | --- | --- | --- | --- | --- |
| Bruix[14] | 2017 | RESORCE/  III | 1.1 | Multinational | Asian  (A*, 41%, B, 40%) | Regorafenib | 573 | 7 | A, 10.6, B, 7.8 | 0.63  [0.5-0.79] | A, 3.1, B, 1.5 | 0.46  [1.4-1.6] | A, 11, B, 4 | 2.74  [1.25- 5.98] |
| Abou-Alsfa[15] | 2018 | CELESTIAL/  III | 1.1 | Multinational | Caucasian  (A, 56%, B, 55%) | Cabozantinib | 707 | NR | A, 10.2, B, 8 | 0.76  [0.63-0.92] | A, 5.2, B, 1.9 | 0.44  [0.36-0.52] | A, 4, B, 1 | 9.39  [1.24-70.8] |
| Zhu[16] | 2015 | REACH/  III | 1.1 | Multinational | Caucasian  (A, 49 B, 49%) | Ramucirumab | 644 | A, 8.3, B, 7.0 | A, 9.2, B, 7.6 | 0.86  [0.72-1.05] | A, 2.8, B, 2.1 | 0.63  [0.52-0.75] | A, 7. B, <1 | 10.6  [2.46-45.9] |
| Zhu[17] | 2019 | REACH-2/  III | 1.1 | Multinational | Asian  (A, 52%; B, 47%) | Ramucirumab | 292 | 7.6 | A, 8.5, B, 7.3 | 0.71  [0.53-0.94] | A, 2.8, B, 1.6 | 0.45  [0.33-0.60] | A, 5, B, 1 | 4.50  [0.56-36.0] |
| Li[18] | 2020 | NCT02329860/  III | NR* | China | Asian  (NR) | Apatinib | 393 | NR | A, 8.7, B, 6.8 | 0.78  [0.61-0.99] | A, 4.5, B, 1.9 | 0.47  [0.36-0.60] | A, 10.7, B, 1.5 | 7.81  [1.83-33.3] |
| Finn[19] | 2019 | KEYNOTE-240/  III | 1.1 | Multinational | Caucasian  (51.6%) | Pembrolizumab | 413 | A, 13.8, B, 10.6 | A, 13,9, B, 10.6 | 0.78  [0.61-0.99] | A, 3.0, B, 2.8 | 0.71  [0.57-0.90] | A, 18.3, B, 4.4 | 4.83  [2.01-11.5] |
| Llovet[20] | 2013 | BRISK-PS/  III | mRECIST | Multinational | Caucasian  (A, 46%; B, 50%) | Brivanib | 395 | NR | A, 9.4, B, 8.2 | 0.89  [0.69-1.15] | A, 4.2, B, 2.7 | 0.56  [0.42-0.76] | A, 10, B, 2 | 7.13  [1.66-30.5] |
| Santoro[21] | 2013 | NCT00988741/  II | 1.1 | Multinational | Caucasian  (94%) | Tivantinib | 107 | 5.5 | A, 6.6, B, 6.2 | 0.9  [0.57-1.40] | A, 1.5, B, 1.4 | 0.67  [0.44-1.04] | A, 44, B, 31 | 1.55  [0.061-39.0] |
| Zhu[22] | 2014 | EVOLVE-1/  III | 1.0 | Multinational | Caucasian  (A, 53%; B, 59%) | Everolimus | 546 | 24.6 | A, 7.6, B, 7.3 | 1.05  [0.86-1.27] | A, 3.0, B, 2.6 | 0.93  [0.75-1.15] | A, 2.2, B, 1.6 | 1.31  [0.35-5.20] |
| Kang[23] | 2015 | NCT01210495/  II | 1.1 | Multinational | Asian  (A, 63%; B, 62%) | Axitinib | 202 | NR | A, 12.7, B, 9.7 | 0.90  [0.64-1.27] | A, 3.6, B, 1.9 | 0.61  [0.43-0.87] | A, 9.7, B, 2.9 | 3.54  [0.77-16.1] |
| Rimassa[24] | 2018 | NCT01755767  /III | 1.1 | Multinational | Caucasian  (A, 72%, B, 75%) | Tivantinib | 340 | 18.1 | A, 8.4, B, 9.1 | 0.97  [0.75-1.25] | A, 2.1, B, 2.0 | 0.96  [0.75-1.22] | A, <1 B, <1 | 0.507  [0.010-25.7] |

*NR: not reported

*A - Treatment Arm; B – Placebo

**References**

1. Yau, T.; Park, J.W.; Finn, R.S.; Cheng, A.L.; Mathurin, P.; Edeline, J.; Kudo, M.; Han, K.H.; Harding, J.J.; Merle, P., et al. CheckMate 459: a randomized, multi-center phase III study of nivolumab (NIVO) vs sorafenib (SOR) as first-line (1L) treatment in patients (pts) with advanced hepatocellular carcinoma (aHCC). *Annals of oncology* **2019**, *30*, v874‐v875,

2. Finn, R.S.; Qin, S.; Ikeda, M.; Galle, P.R.; Ducreux, M.; Kim, T.Y.; Kudo, M.; Breder, V.; Merle, P.; Kaseb, A.O., et al. Atezolizumab plus Bevacizumab in Unresectable Hepatocellular Carcinoma. *N Engl J Med.* **2020**, *382*, 1894-1905. doi: 1810.1056/NEJMoa1915745.

3. Llovet, J.M.; Ricci, S.; Mazzaferro, V.; Hilgard, P.; Gane, E.; Blanc, J.F.; De Oliveira, A.C.; Santoro, A.; Raoul, J.L.; Forner, A., et al. Sorafenib in advanced hepatocellular carcinoma. *New England Journal of Medicine* **2008**, *359*, 378-390, doi:10.1056/NEJMoa0708857.

4. Cheng, A.L.; Kang, Y.K.; Chen, Z.; Tsao, C.J.; Qin, S.; Kim, J.S.; Luo, R.; Feng, J.; Ye, S.; Yang, T.S., et al. Efficacy and safety of sorafenib in patients in the Asia-Pacific region with advanced hepatocellular carcinoma: a phase III randomised, double- blind, placebo-controlled trial. *Lancet Oncol.* **2009**, *10*, 25-34. doi: 10.1016/S1470-2045(1008)70285-70287. Epub 72008 Dec 70216.

5. Abou-Alfa, G.K.; Shi, Q.; Knox, J.J.; Kaubisch, A.; Niedzwiecki, D.; Posey, J.; Tan, B.R.; Kavan, P.; Goel, R.; Lammers, P.E., et al. Assessment of Treatment with Sorafenib Plus Doxorubicin vs Sorafenib Alone in Patients with Advanced Hepatocellular Carcinoma: Phase 3 CALGB 80802 Randomized Clinical Trial. *JAMA Oncology* **2019**, *5*, 1582-1588, doi:10.1001/jamaoncol.2019.2792.

6. Kudo, M.; Finn, R.S.; Qin, S.; Han, K.H.; Ikeda, K.; Piscaglia, F.; Baron, A.; Park, J.W.; Han, G.; Jassem, J., et al. Lenvatinib versus sorafenib in first-line treatment of patients with unresectable hepatocellular carcinoma: a randomised phase 3 non- inferiority trial. *Lancet.* **2018**, *391*, 1163-1173. doi: 1110.1016/S0140-6736(1118)30207-30201.

7. Bi, F.; Qin, S.; Gu, S.; Bai, Y.; Chen, Z.; Wang, Z.; Ying, J.; Lu, Y.; Meng, Z.; Pan, H., et al. Donafenib versus sorafenib as first-line therapy in advanced hepatocellular carcinoma: An open-label, randomized, multicenter phase II/III trial. *Journal of Clinical Oncology* **2020**, *38*, 4506-4506, doi:10.1200/JCO.2020.38.15_suppl.4506.

8. Cheng, A.-L.; Kang, Y.-K.; Lin, D.-Y.; Park, J.-W.; Kudo, M.; Qin, S.; Chung, H.-C.; Song, X.; Xu, J.; Poggi, G., et al. Sunitinib Versus Sorafenib in Advanced Hepatocellular Cancer: Results of a Randomized Phase III Trial. *Journal of Clinical Oncology* **2013**, *31*, 4067-4075, doi:10.1200/JCO.2012.45.8372.

9. Johnson, P.J.; Qin, S.; Park, J.W.; Poon, R.T.P.; Raoul, J.L.; Philip, P.A.; Hsu, C.H.; Hu, T.H.; Heo, J.; Xu, J., et al. Brivanib versus sorafenib as first-line therapy in patients with unresectable, advanced hepatocellular carcinoma: Results from the randomized phase III BRISK-FL study. *Journal of Clinical Oncology* **2013**, *31*, 3517-3524, doi:10.1200/JCO.2012.48.4410.

10. Zhu, A.X.; Rosmorduc, O.; Evans, T.R.; Ross, P.J.; Santoro, A.; Carrilho, F.J.; Bruix, J.; Qin, S.; Thuluvath, P.J.; Llovet, J.M., et al. SEARCH: a phase III, randomized, double-blind, placebo-controlled trial of sorafenib plus erlotinib in patients with advanced hepatocellular carcinoma. *Journal of clinical oncology* **2015**, *33*, 559‐566, doi:10.1200/JCO.2013.53.7746.

11. Cainap, C.; Qin, S.; Huang, W.T.; Chung, I.J.; Pan, H.; Cheng, Y.; Kudo, M.; Kang, Y.K.; Chen, P.J.; Toh, H.C., et al. Linifanib versus Sorafenib in patients with advanced hepatocellular carcinoma: results of a randomized phase III trial. *Journal of clinical oncology* **2015**, *33*, 172‐179, doi:10.1200/JCO.2013.54.3298.

12. Cheng, A.L.; Kang, Y.K.; He, A.R.; Lim, H.Y.; Ryoo, B.Y.; Hung, C.H.; Sheen, I.S.; Izumi, N.; Austin, T.; Wang, Q., et al. Safety and efficacy of tigatuzumab plus sorafenib as first-line therapy in subjects with advanced hepatocellular carcinoma: a phase 2 randomized study. *Journal of hepatology* **2015**, *63*, 896‐904, doi:10.1016/j.jhep.2015.06.001.

13. Kudo, M.; Ryoo, B.Y.; Lim, H.Y.; Kim, D.Y.; Okusaka, T.; Ikeda, M.; Hidaka, H.; Yeon, J.E.; Mizukoshi, E.; Morimoto, M., et al. Resminostat and sorafenib combination therapy for advanced hepatocellular carcinoma in patients previously untreated with systemic chemotherapy. *Journal of clinical oncology* **2017**, *35*.

14. Bruix, J.; Qin, S.; Merle, P.; Granito, A.; Huang, Y.H.; Bodoky, G.; Pracht, M.; Yokosuka, O.; Rosmorduc, O.; Breder, V., et al. Regorafenib for patients with hepatocellular carcinoma who progressed on sorafenib treatment (RESORCE): a randomised, double-blind, placebo- controlled, phase 3 trial. *Lancet.* **2017**, *389*, 56-66. doi: 10.1016/S0140-6736(1016)32453-32459. Epub 32016 Dec 32456.

15. Abou-Alfa, G.K.; Meyer, T.; Cheng, A.L.; El-Khoueiry, A.; Rimassa, L.; Ryoo, B.Y.; Cicin, I.; Merle, P.; Chen, Y.H.; Park, J.W., et al. Cabozantinib (C) versus placebo (P) in patients (pts) with advanced hepatocellular carcinoma (HCC) who have received prior sorafenib: Results from the randomized phase 3 CELESTIAL trial. *Journal of Clinical Oncology* **2018**, *36*,

16. Zhu, A.X.; Park, J.O.; Ryoo, B.Y.; Yen, C.J.; Poon, R.; Pastorelli, D.; Blanc, J.F.; Chung, H.C.; Baron, A.D.; Pfiffer, T.E.F., et al. Ramucirumab versus placebo as second-line treatment in patients with advanced hepatocellular carcinoma following first-line therapy with sorafenib (REACH): A randomised, double-blind, multicentre, phase 3 trial. *The Lancet Oncology* **2015**, *16*, 859-870, doi:10.1016/S1470-2045(15)00050-9.

17. Zhu, A.X.; Kang, Y.K.; Yen, C.J.; Finn, R.S.; Galle, P.R.; Llovet, J.M.; Assenat, E.; Brandi, G.; Pracht, M.; Lim, H.Y., et al. Ramucirumab after sorafenib in patients with advanced hepatocellular carcinoma and increased alpha-fetoprotein concentrations (REACH-2): a randomised, double-blind, placebo-controlled, phase 3 trial. *Lancet Oncol.* **2019**, *20*, 282-296. doi: 210.1016/S1470-2045(1018)30937-30939. Epub 32019 Jan 30918.

18. Li, Q.; Qin, S.; Gu, S.; Chen, X.; Lin, L.; Wang, Z.; Xu, A.; Chen, X.; Zhou, C.; Ren, Z., et al. Apatinib as second-line therapy in Chinese patients with advanced hepatocellular carcinoma: A randomized, placebo-controlled, double-blind, phase III study. *Journal of Clinical Oncology* **2020**, *38*, 4507-4507, doi:10.1200/JCO.2020.38.15_suppl.4507.

19. Finn, R.S.; Ryoo, B.Y.; Merle, P.; Kudo, M.; Bouattour, M.; Lim, H.Y.; Breder, V.; Edeline, J.; Chao, Y.; Ogasawara, S., et al. Pembrolizumab As Second-Line Therapy in Patients With Advanced Hepatocellular Carcinoma in KEYNOTE-240: A Randomized, Double-Blind, Phase III Trial. *Journal of clinical oncology : official journal of the American Society of Clinical Oncology* **2020**, *38*, 193-202, doi:10.1200/JCO.19.01307.

20. Llovet, J.M.; Decaens, T.; Raoul, J.L.; Boucher, E.; Kudo, M.; Chang, C.; Kang, Y.K.; Assenat, E.; Lim, H.Y.; Boige, V., et al. Brivanib in patients with advanced hepatocellular carcinoma who were intolerant to sorafenib or for whom sorafenib failed: results from the randomized phase III BRISK-PS study. *J Clin Oncol.* **2013**, *31*, 3509-3516. doi: 3510.1200/JCO.2012.3547.3009. Epub 2013 Aug 3526.

21. Santoro, A.; Rimassa, L.; Borbath, I.; Daniele, B.; Salvagni, S.; Van Laethem, J.L.; Van Vlierberghe, H.; Trojan, J.; Kolligs, F.T.; Weiss, A., et al. Tivantinib for second-line treatment of advanced hepatocellular carcinoma: A randomised, placebo-controlled phase 2 study. *The Lancet Oncology* **2013**, *14*, 55-63, doi:10.1016/S1470-2045(12)70490-4.

22. Zhu, A.X.; Kudo, M.; Assenat, E.; Cattan, S.; Kang, Y.K.; Lim, H.Y.; Poon, R.T.; Blanc, J.F.; Vogel, A.; Chen, C.L., et al. Effect of everolimus on survival in advanced hepatocellular carcinoma after failure of sorafenib: the EVOLVE-1 randomized clinical trial. *JAMA.* **2014**, *312*, 57-67. doi: 10.1001/jama.2014.7189.

23. Kang, Y.K.; Yau, T.; Park, J.W.; Lim, H.Y.; Lee, T.Y.; Obi, S.; Chan, S.L.; Qin, S.; Kim, R.D.; Casey, M., et al. Randomized phase II study of axitinib versus placebo plus best supportive care in second-line treatment of advanced hepatocellular carcinoma. *Ann Oncol.* **2015**, *26*, 2457-2463. doi: 2410.1093/annonc/mdv2388. Epub 2015 Sep 2418.

24. Rimassa, L.; Assenat, E.; Peck-Radosavljevic, M.; Pracht, M.; Zagonel, V.; Mathurin, P.; Rota Caremoli, E.; Porta, C.; Daniele, B.; Bolondi, L., et al. Tivantinib for second-line treatment of MET-high, advanced hepatocellular carcinoma (METIV-HCC): a final analysis of a phase 3, randomised, placebo-controlled study. *The lancet. Oncology* **2018**, *19*, 682‐693, doi:10.1016/S1470-2045(18)30146-3.

**Supplemental Figure 1A: RoB 2.0 for Within-study Bias Assessment for First line Trials**

**Supplemental Figure 1B: RoB 2.0 for Within-study Bias Assessment for Second line Trials**

**Supplemental Figure 2: Funnel Plot for First Line Trials**

**Supplemental Figure 3: Funnel Plot for Second Line Trials**

**Supplemental Figure 4A: Net Rank Plot for First Line Trials, HR for OS**

**Supplemental Figure 4B: Net Rank Plot for First Line Trials, OR for ORR**

**Supplemental Figure 5A: Net Rank Plot for Second Line Trials, HR for PFS**

**Supplemental Figure 5B: Net Rank Plot for Second Line Trials, OR for ORR**
